# Supplementary material
Source: PubMed Central journal article supplement (PMC11072145)
Supplement: 18_2022_4346_MOESM1_ESM.pdf [file 18_2022_4346_MOESM1_ESM.pdf]

## SUPPLEMENTARY INFORMATION

### Mechanosensors control of skeletal muscle mass, molecular clocks, and metabolism

Mathias Vanmunster, Ana Victoria Rojo Garcia, Alexander Pacolet, Sebastiaan Dalle, Katrien Koppo, Ilse Jonkers, Rik Lories and Frank Suhr

#### Supplementary tables

| Gene name       | Sense primer (5'→3')     | Antisense primer (3'→5')   | Amplicon size [bp] |
|-----------------|--------------------------|----------------------------|--------------------|
| <i>Bmal1</i>    | AAGTAGGTCAGGGACGGAGG     | GGAAGGAAGGTGCAATGAAGG      | 192                |
| <i>Cd36</i>     | GTGGGTCTGAAGGACTGGAA     | CACATTTTCAGAAGGCAGCAAC     | 236                |
| <i>Clock</i>    | GCGGTGAATTTTGAGGGGTG     | TCAGAACTCTTGCTGGTGATT      | 249                |
| <i>Cry2</i>     | GGGGACTCTGTCTATTGGCATC   | GGCTCTTGGGTAGGCATCTC       | 223                |
| <i>Fbxl21</i>   | TGGAAGTGAAGTCAGATGGGTG   | GACTGACCTATAAAATCACTGAAGG  | 110                |
| <i>Fbxo32</i>   | TCAGAGAGGCAGATTCGCAAG    | TGAGGGGAAAGTGAGACGGA       | 218                |
| <i>Fermt2</i>   | ACCAAGGGTGGCTAGATTCCTC   | ATACTGCAAGGCTGCGAACA       | 221                |
| <i>G6pc3</i>    | ACCTCGTCTTCAAGTGGATTCTGT | GGAGCTGTGTGCTGTAGTAGTCGGT  | 80                 |
| <i>Hk2</i>      | TCAAAGAGAACAAGGGCGAGG    | CGCTTGGCAAAATGGGGATGT      | 88                 |
| <i>Ilk</i>      | ACGACCTCAATCAGGGGGATG    | AGCATTTCAACCACCGCAGA       | 85                 |
| <i>Mfn2</i>     | CCAGCTAGAACTTCTCCTCTGTTC | GGGGAAGCATTCACTTCAGCCA     | 181                |
| <i>Mtor1</i>    | TGCGGCAGGATGAACGAGTG     | GCCCGAGTTGGTGGACAGAG       | 131                |
| <i>Nrf1</i>     | GCTGCAGGTCCTGTGGGAA      | GTTGGGTTTGGAGGGTGAGA       | 207                |
| <i>Opa1</i>     | GGGATCTGCTGTGGAGGTGG     | CCTAACAAAGAGAAGGGCCTCAGAAA | 297                |
| <i>P70s6kb1</i> | CACGAACACCTGTCAGCCCA     | CCCCGCTCACTGTCACATCC       | 147                |
| <i>Per1</i>     | TTGATGTGACGGCGTGTGT      | CAGCCCAATCCATCCAGTT        | 95                 |
| <i>Per2</i>     | CCCGAGCTAGAGACGGTAGAA    | AGCCAGAACTTCCTTGGTGAG      | 123                |
| <i>Pfkfb</i>    | GTTTGAAGCCTCTCCTCCTC     | GCATTCATACCTTGGGCATCT      | 233                |
| <i>Pxn</i>      | GCCTGGAACAGAGAGTGGATGG   | GGGTGAGCTGCTCCCAGTTTT      | 131                |
| <i>RevErba</i>  | CCTCAGCGTCTACCCTTCT      | ACACCCTGTGTGTATTGG         | 234                |
| <i>RevErbb</i>  | GTGGACAGTACAAAGGGAGGA    | TTGCTCATAGGACACACCAGA      | 208                |
| <i>Rpl41</i>    | ATGAGAGCGAAGTGCCGGAAG    | CAGGGCAGAGGGACTGTTTTG      | 260                |
| <i>Slc2a4</i>   | AGGCACCCTCACTACGCTCT     | GGCCAGCATAGCCCTTTTCCTTC    | 121                |
| <i>Tbc1d1</i>   | CAGCGTGGGGCGGCAAGAG      | CTGAGGGCAGAATCCAGTGAGGTG   | 145                |
| <i>Tcap</i>     | GAATACCAGTGCCGTACCA      | TTGTGATCTCAGCCACGTCC       | 175                |
| <i>Tln2</i>     | CAAGGTTCTGGGCGAGTCAA     | ACACATTCTCCGAAGGCAGG       | 78                 |
| <i>Trim63</i>   | GGTGCCTACTTGCTCCTTGT     | ACCTGGTGGCTATTCTCCTTG      | 201                |
| <i>Vcl</i>      | CGATGAGGCTGAGGTTCTGTAATA | AGTCAACTCCTGCTGTCTCTC      | 172                |
| <i>Yap</i>      | TCGGCAGGCAATACGGAATATCAA | GCATTCGGAGTCCCTCCATC       | 114                |

**Table S1** Primer sequences and amplicon sizes.

## Supplementary figures

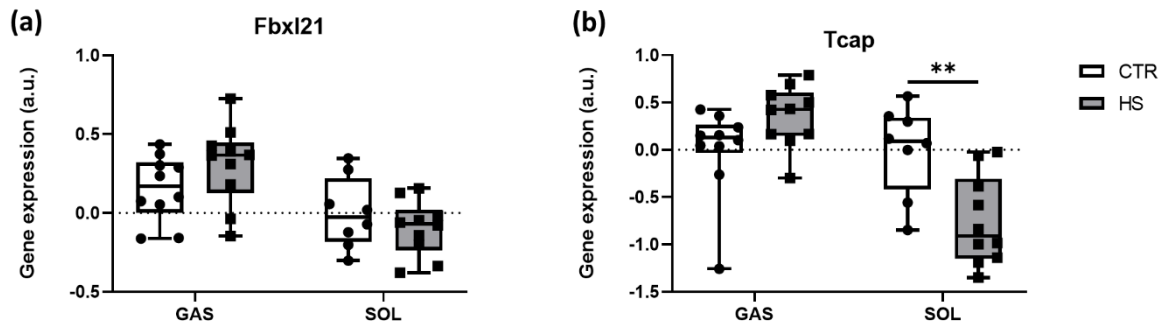

**Fig. S1 Skeletal muscle unloading modifies gene expressions of circadian-related ligases, sarcomeric Z-disk control and gluconeogenesis.** Relative gene expression profiles of (a) Fbxl21 and (b) Tcap between CTR and HS mice in GAS and SOL muscles. Expression is relative to the housekeeping gene Rpl41. Statistical analysis used was two-way ANOVA with Sidak's multiple comparison post hoc test on the following number of animals: GAS 10 CTR and 10 HS animals, SOL 8 CTR and 10 HS animals. \*\*p value<0.01.

## GAS

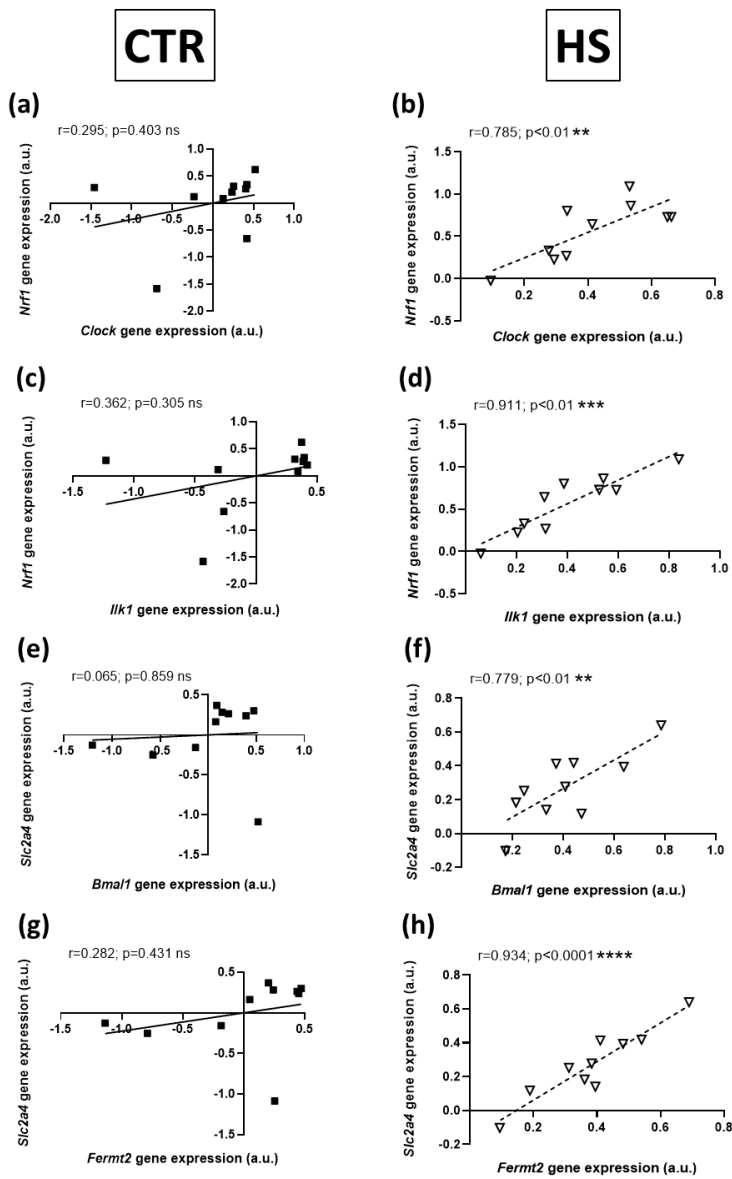

## SOL

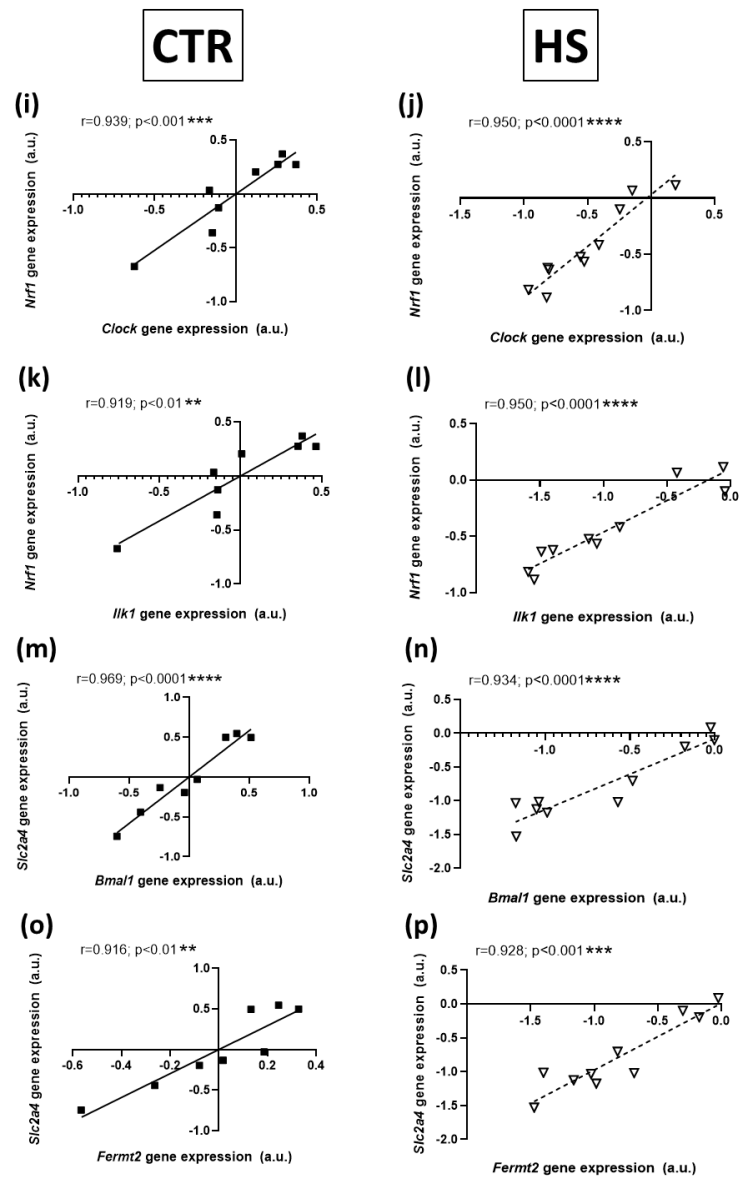

**Fig. S2 Skeletal muscle unloading results in strong correlations between metabolism-related and circadian clock and mechanosensor genes.** Correlations in GAS between *Nrf1* and *Clock* under CTR (a) and HS (b) conditions; between *Nrf1* and *Ilk* under CTR (c) and HS (d) conditions; between *Slc2a4* and *Bmal1* under CTR (e) and HS (f) conditions; between *Slc2a4* and *Fermt2* under CTR (g) and HS (h) conditions. Correlations in SOL between *Nrf1* and *Clock* under CTR (i) and HS (j) conditions; between *Nrf1* and *Ilk* under CTR (k) and HS (l) conditions; between *Slc2a4* and *Bmal1* under CTR (m) and HS (n) conditions; between *Slc2a4* and *Fermt2* under CTR (o) and HS (p) conditions. Correlations between mechanosensor, circadian clock and metabolism-related genes were assessed by using Pearson correlation coefficient analyses on the following number of animals: GAS 10 CTR and 10 HS animals, SOL 10 CTR and 10 HS animals. Correlation coefficients  $r$  and significance levels are provided. \*\*  $p$  value $<0.01$ , \*\*\*  $p$  value $<0.001$ , \*\*\*\*  $p$  value $<0.0001$ .

## GAS

## SOL

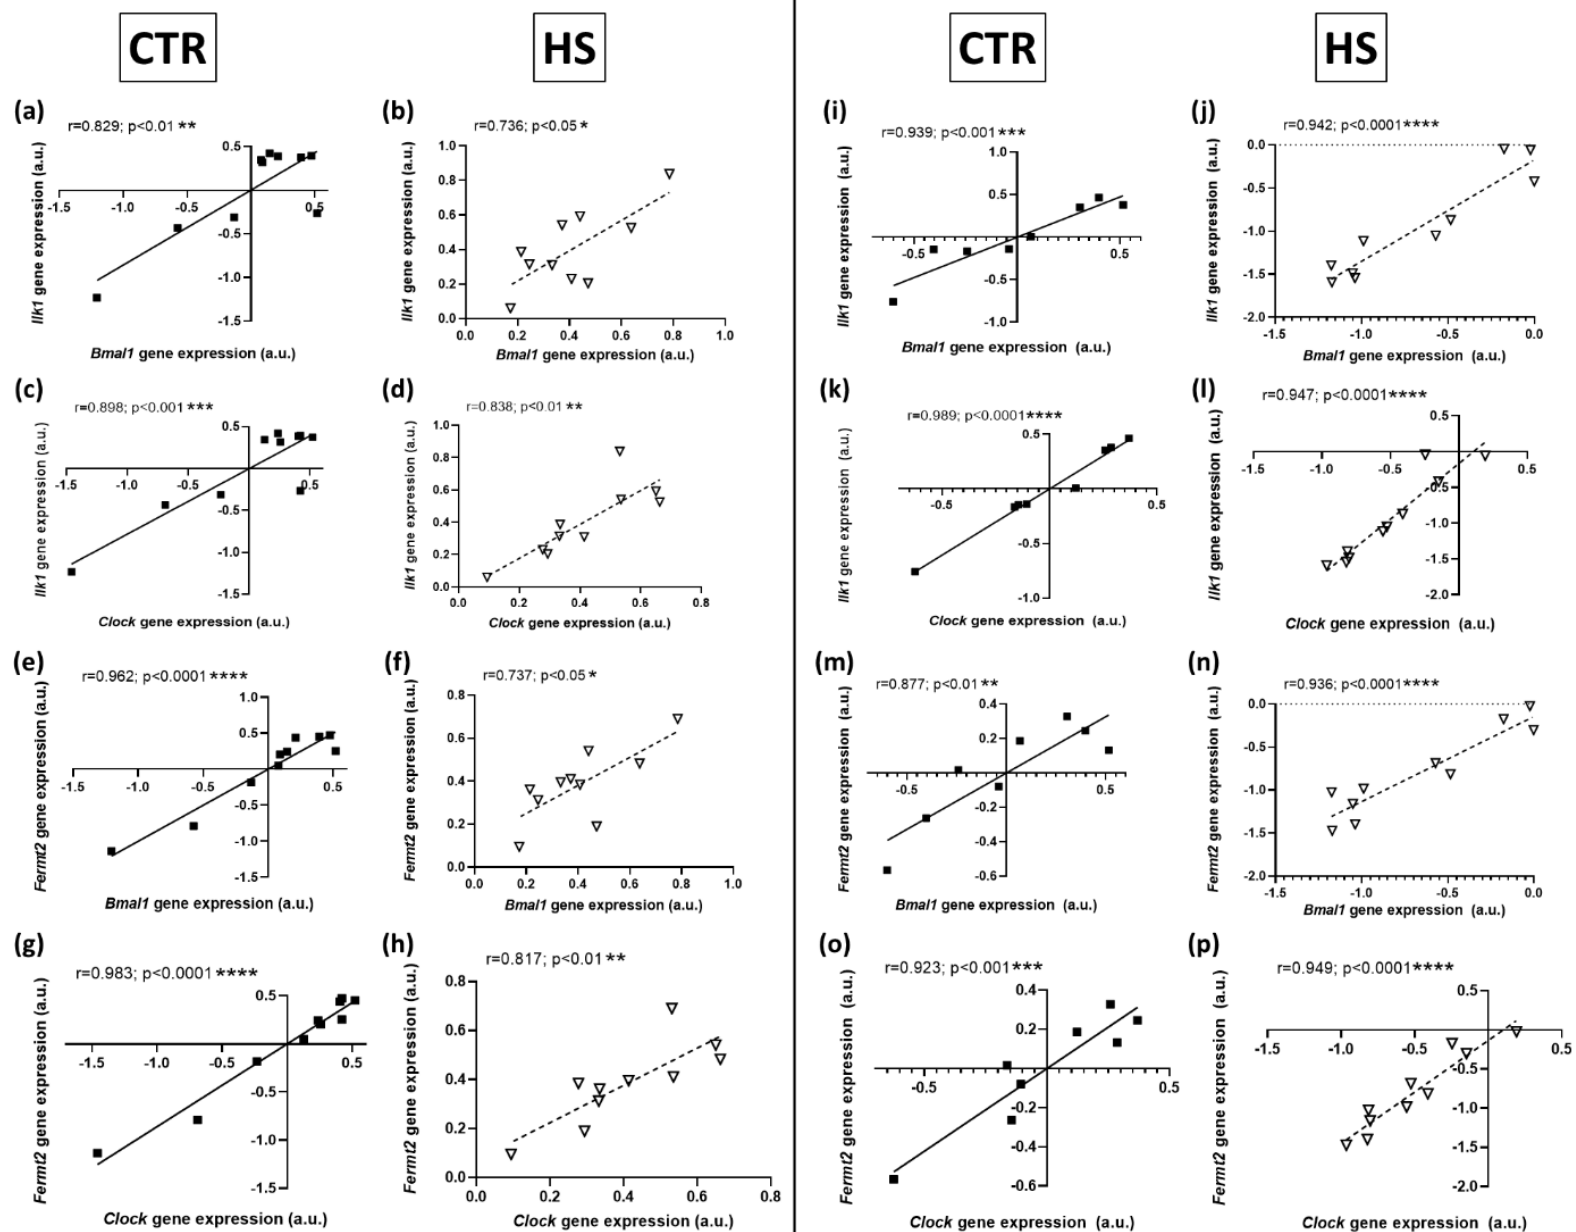

**Fig. S3 Skeletal muscle unloading results in strong correlations between mechanosensor and circadian clock genes.**

Correlations in GAS between *Ilk* and *Bmal1* under CTR (a) and HS (b) conditions; between *Ilk* and *Clock* under CTR (c) and HS (d) conditions; between *Fermt2* and *Bmal1* under CTR (e) and HS (f) conditions; between *Fermt2* and *Clock* under CTR (g) and HS (h) conditions. Correlations in SOL between *Ilk* and *Bmal1* under CTR (i) and HS (j) conditions; between *Ilk* and *Clock* under CTR (k) and HS (l) conditions; between *Fermt2* and *Bmal1* under CTR (m) and HS (n) conditions; between *Fermt2* and *Clock* under CTR (o) and HS (p) conditions. Correlations between mechanosensor and circadian clock genes were assessed by using Pearson correlation coefficient analyses on the following number of animals: GAS 10 CTR and 10 HS animals, SOL 10 CTR and 10 HS animals. Correlation coefficients  $r$  and significance levels are provided. \*  $p$  value $<0.05$ , \*\*  $p$  value $<0.01$ , \*\*\*  $p$  value $<0.001$ , \*\*\*\*  $p$  value $<0.0001$ .

In addition to data presented in figure 6, we performed supplementary analyses in *Ilk1* and *Fermt2* siRNA-treated C2C12 myoblasts on a selection of genes, involving mechanosensors, myosin heavy chains, transcription factors, reference genes and metabolic markers. Our findings are presented below, but are not further discussed in the main body of this paper.

In *Ilk1* siRNA-treated C2C12 cells, gene expression levels of the mechanosensor *Yap* tended to be lower, while we observed no change in *Pxn* relative to control siRNA (both fig. S4a). We next analyzed myosin heavy chain gene expression and confirmed previously reported findings with significant higher levels of the slow-myosin-coding *Myh7* gene and significant lower levels of fast-myosin-coding *Myh1* gene in *Ilk1* siRNA-treated C2C12 myoblast (both fig. S4b). In addition, expression levels of transcription factors *Six1* and *Six4* were significantly lower upon treatment with *Ilk1* siRNA, while gene expression levels *Nfact1* did not change relative to control siRNA (all fig. S4c). We next analyzed the expression levels of reference genes commonly used to normalize RT-qPCR data. We observed no changes in the expression of *Rpl27*, *18S* and *28S* between control- and *Ilk* siRNA-treated C2C12 myoblasts (all fig. S4d). We further analyzed gene expression levels of several metabolic markers upon treatment of C2C12 myoblast with *Ilk1* siRNA (all in fig. S4e). Expression levels of the glycolytic marker *Slc2a4* did not change upon treatment in *Ilk1* siRNA-treated C2C12 cells. Gene expression levels of *Tfam* and *Sdhb*, both markers of the oxidative metabolism, were significantly lower, while expression levels of *Ppargc1a* did not change in the *Ilk1* siRNA approach. Relative to control siRNA, gene expression levels of autophagy markers (i.e. *Foxo3*, *Bcl2* and *Bag3*) and markers of angiogenesis (*Vegfa* and *Flt1*) were significantly lower in *Ilk1* siRNA-treated C2C12 myoblasts.

In *Fermt2*-treated C2C12 cells, gene expression levels of the mechanosensor *Yap* tended to be lower, while expression *Pxn* did not change relative to control siRNA (both fig. S4f). We next analyzed myosin heavy chain gene expression and reported significant higher levels of the fast-myosin-coding *Myh4* gene and the slow-myosin-coding *Myh7* gene upon treatment with *Fermt2* siRNA (both fig. S4g). In addition, expression levels of transcription factor *Six1* tended to be lower, while *Nfatc1* expression was significantly lower in *Fermt2* siRNA-treated myoblasts (both fig. S4h). Expression levels of *Six4* (fig. S4h) did not change upon treatment with *Fermt2* siRNA. Expression levels of commonly used reference genes (*Rpl27*, *18S*, *28S* (all fig. S4i)) did not change between control- and *Ilk* siRNA-treated C2C12 myoblasts. We further analyzed gene expression levels of several metabolic markers upon treatment of C2C12 myoblast with *Fermt2* siRNA (all fig. S4j). Expression levels of the glycolytic marker *Slc2a4* did not change upon treatment in *Ilk1* siRNA-treated C2C12 cells. Gene expression levels of markers of the oxidative metabolism, *Tfam* and *Sdhb*, were significantly lower upon treatment with *Fermt2* siRNA, while expression levels of *Ppargc1a* tended to be lower. Relative to control siRNA, gene expression levels of autophagy markers (both *Foxo3* and *Bag3*, but not *Bcl2*) and markers of angiogenesis (*Vegfa* and *Flt1*) were significantly lower in *Ilk1* siRNA-treated C2C12 myoblasts.

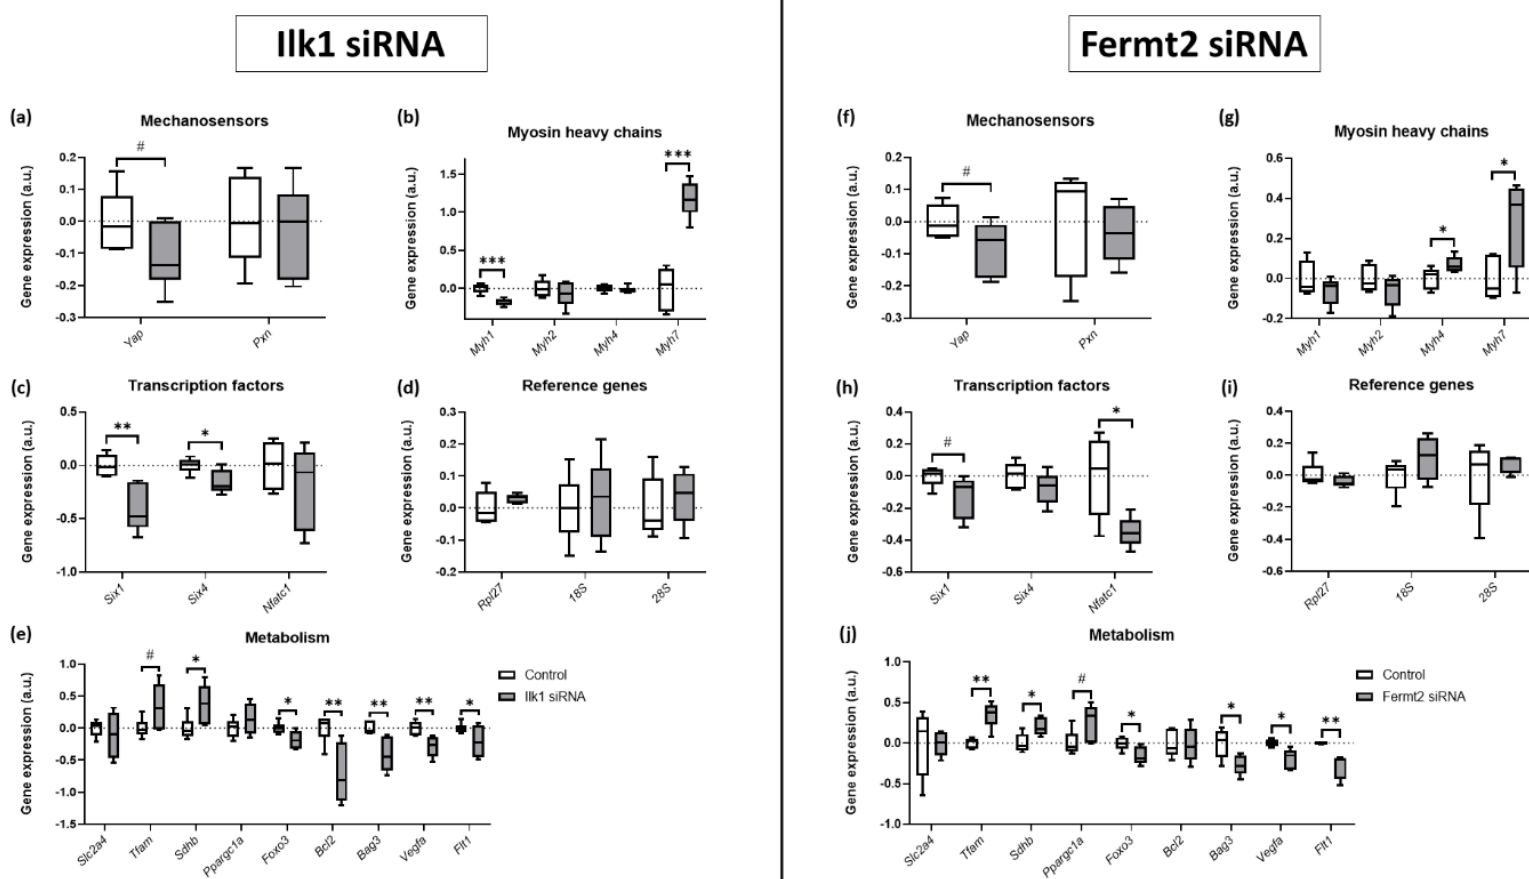

**Fig. S4 Gene expression levels of mechanosensors, myosin heavy chains, transcription factors and metabolic markers upon Knockdown of either Ilk1 or Fermt2 in C2C12 myotubes.** Relative gene expression profiles of (a) mechanosensors (*Yap* and *Pxn*), (b) myosin heavy chains (*Myh1*, *Myh2*, *Myh4* and *Myh7*), (c) transcription factors (*Six1*, *Six4* and *Nfatc1*), (d) reference genes (*Rpl27*, *18S*, *28S*), and (e) metabolic markers (*Slc2a4*, *Tfam*, *Sdhb*, *Ppargc1a*, *Foxo3*, *Bcl2*, *Bag3*, *Vegfa* and *Flt1*) between Ilk1 SiRNA-treated (n=6) and control SiRNA-treated (n=6) C2C12 myotubes. Relative gene expression profiles of (f) mechanosensors (*Yap* and *Pxn*), (g) myosin heavy chains (*Myh1*, *Myh2*, *Myh4* and *Myh7*), (h) transcription factors (*Six1*, *Six4* and *Nfatc1*), (i) reference genes (*Rpl27*, *18S*, *28S*), and (j) metabolic markers (*Slc2a4*, *Tfam*, *Sdhb*, *Ppargc1a*, *Foxo3*, *Bcl2*, *Bag3*, *Vegfa* and *Flt1*) between Fermt2 SiRNA-treated (n=6) and control SiRNA-treated (n=6) C2C12 myotubes. Expression is relative to the housekeeping gene *Rpl41*. Statistical analysis used was Student's t test. \*p value<0.05; \*\*p value<0.01; \*\*\*p value<0.001; #p value=0.05-0.1.
